# Supplementary material for: Acceptance of the Human Papillomavirus Vaccine among General Men and Men with a Same-Sex Orientation and Its Influencing Factors: A Systematic Review and Meta-Analysis
Source: MDPI journal article supplement (doi:10.3390/vaccines12010016), 2023-12-22
Supplement: s1 [file s1]

## ***Supplementary Material***

# **Acceptance of the human papillomavirus vaccine among general men and men with a same-sex orientation and its influencing factors: A systematic review and meta-analysis**

**Fang Shen<sup>#</sup>; Yuxia Du <sup>#</sup>; Kexin Cao; Can Chen; Mengya Yang; Rui Yan; Shigui Yang\***

Department of Emergency Medicine, Second Affiliated Hospital, Department of Public Health, State Key Laboratory for Diagnosis

and Treatment of Infectious Diseases. The Key Laboratory of Intelligent Preventive Medicine of Zhejiang Province, Zhejiang

University School of Medicine, Hangzhou 310058, China;

<sup>#</sup>These authors contributed equal.

\*Correspondence author: Prof. Shigui Yang, PhD, Email: yangshigui@zju.edu.cn; Telephone: +86 13605705640, Address: 866

Yuhangtang road, Hangzhou, China

## **1 Supplementary Figures and Tables**

### **1.1 Supplementary Figures**

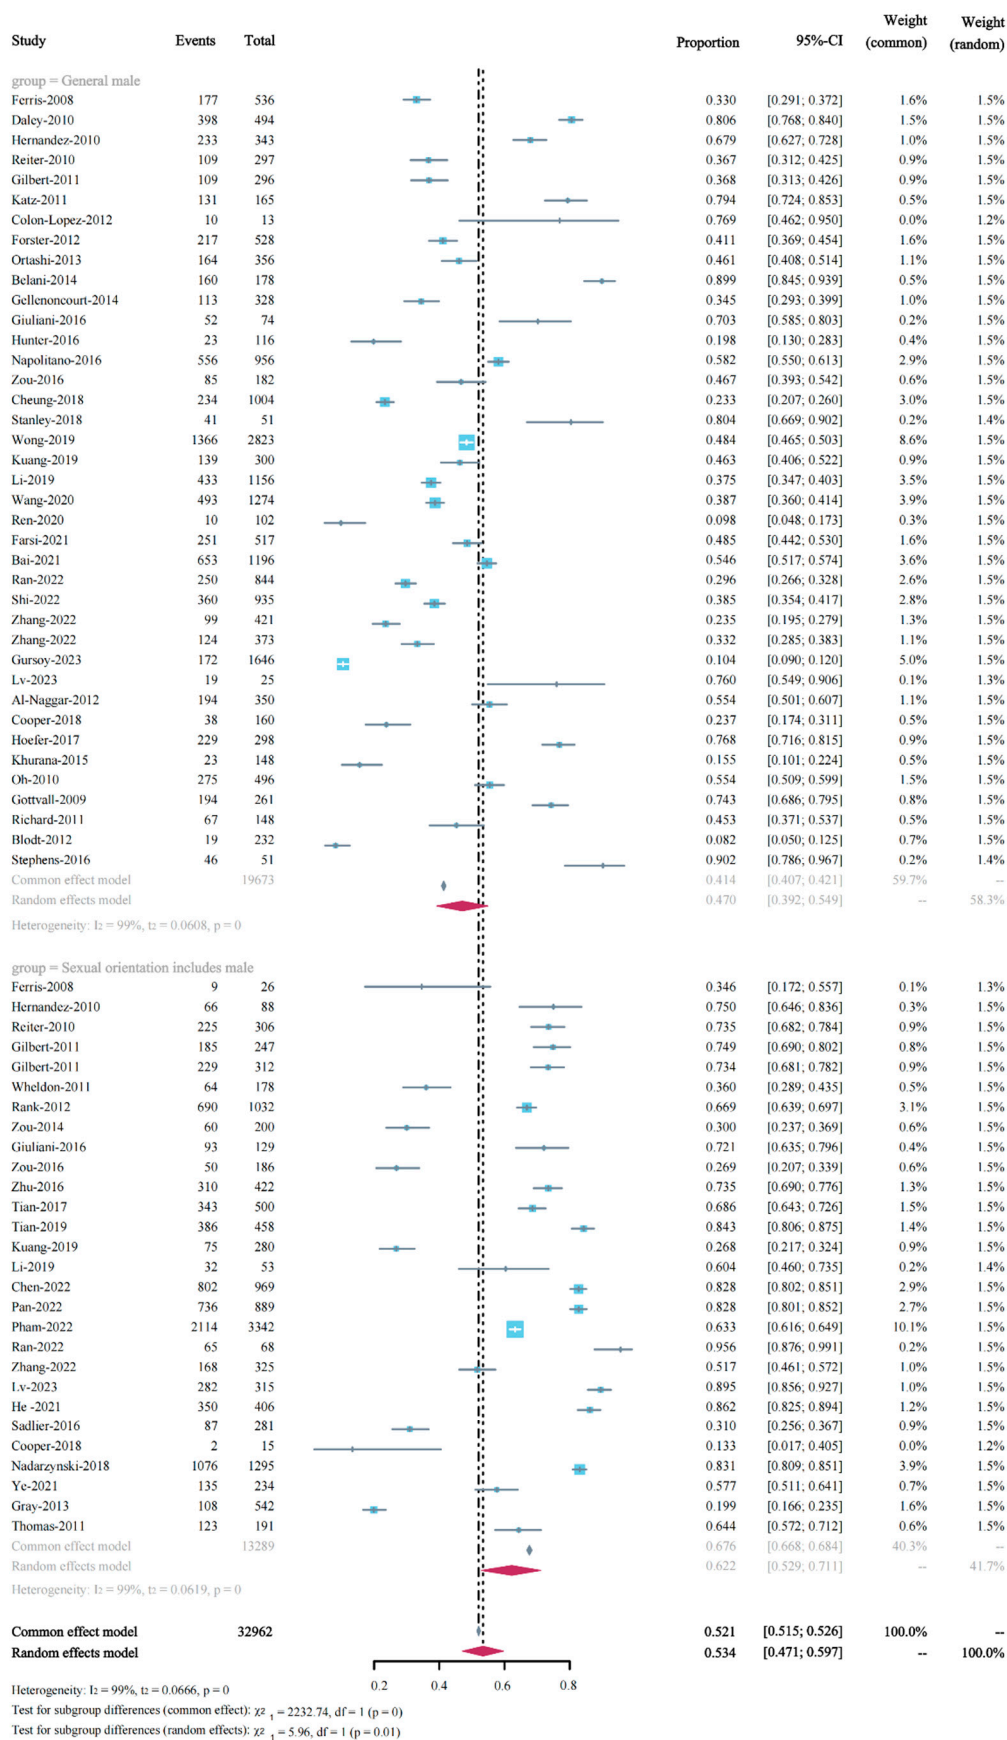

Figure S1 Subgroup analysis of HPV vaccina acceptance rates among general men and men whose sexual orientation includes men

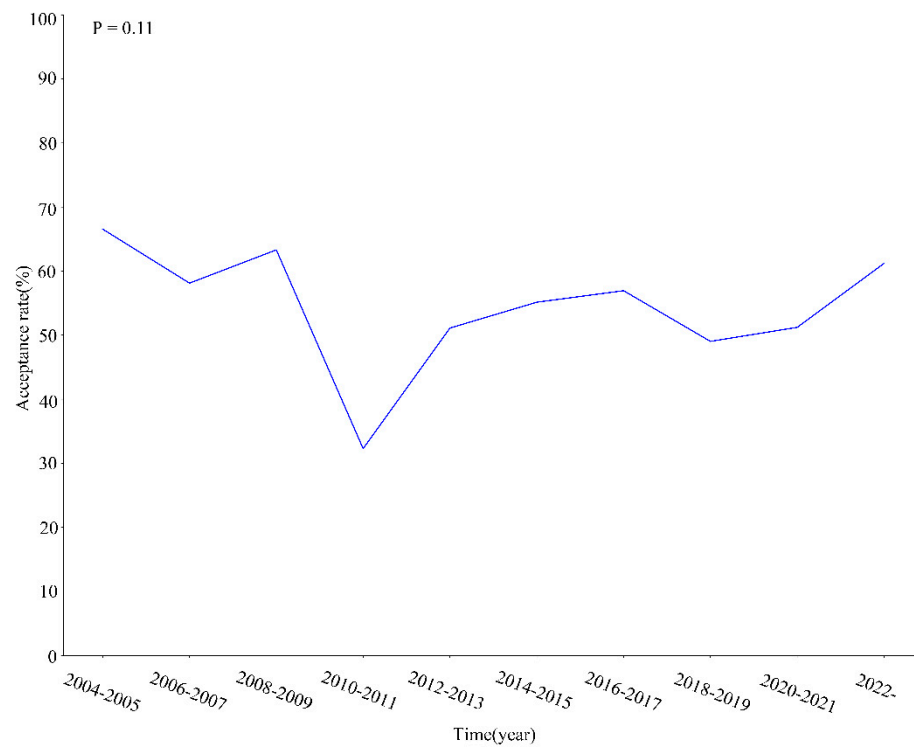

Figure S2. Changes in HPV vaccine acceptance rates over time

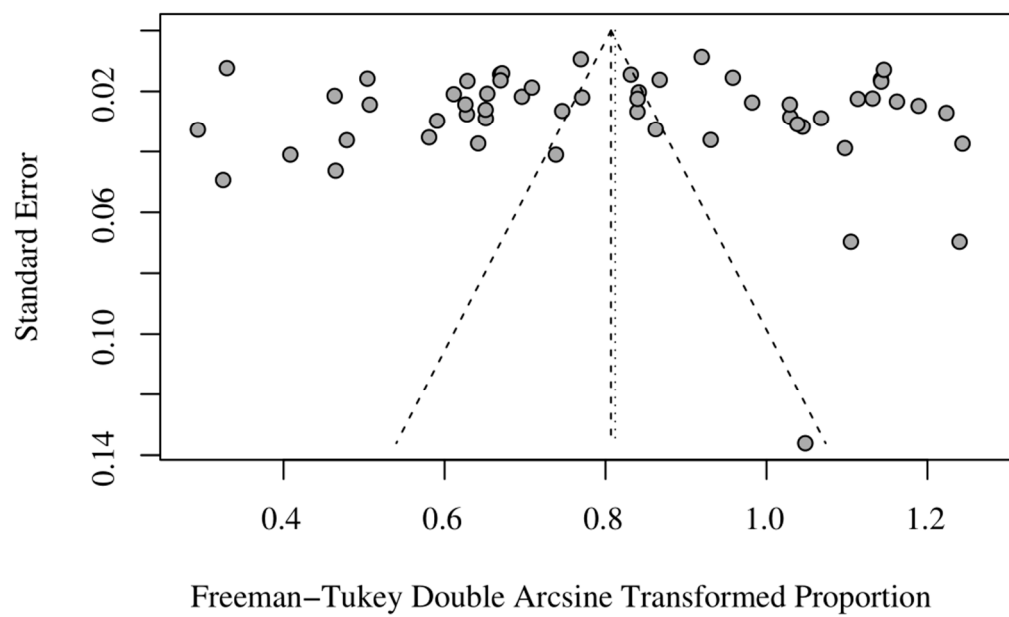

Figure S3 Funnel plot of risk bias

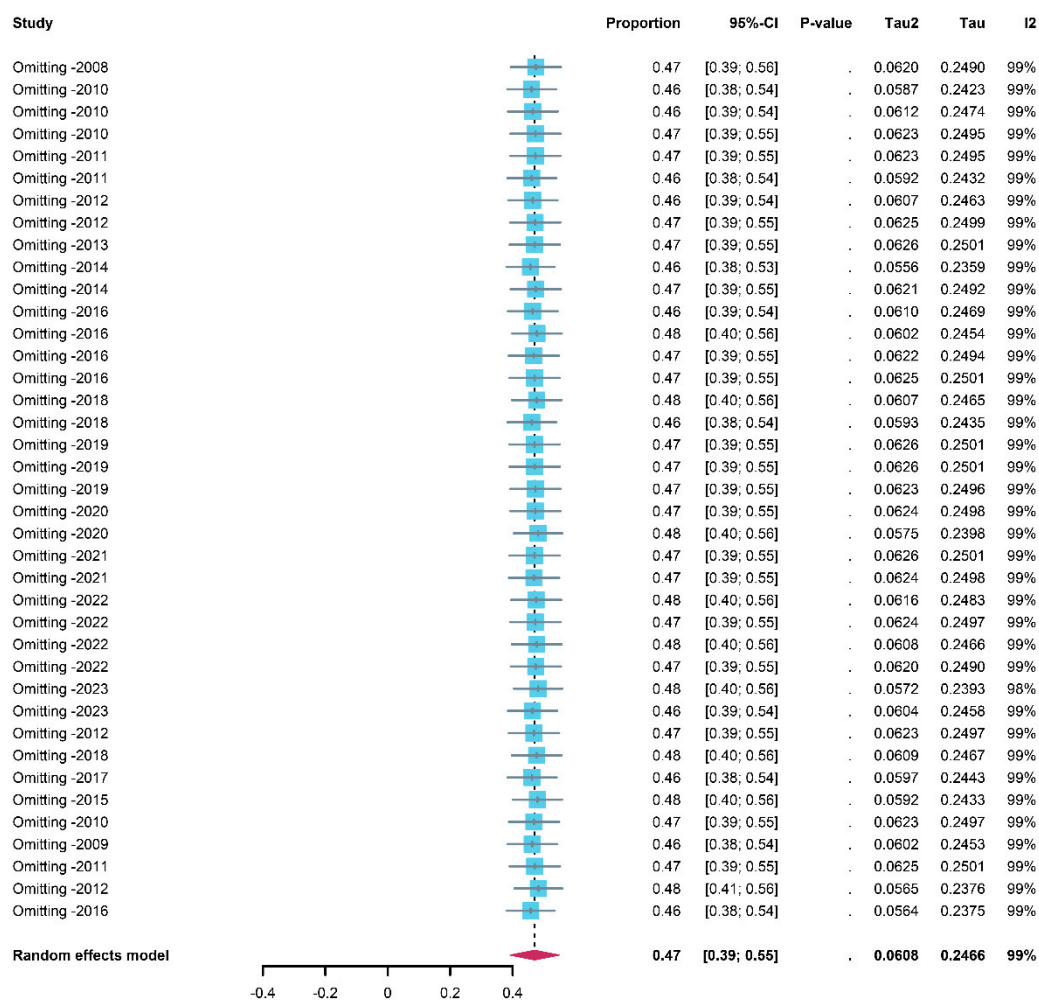

Figure S4 Forest plot for sensitivity analysis

## 1.2 Supplementary Tables

**Table S1.** Literature search strategies

### PubMed

| #  | Searches                                                                                                                                                                                                                                                                                                                                                                                                                                                                                                                                                                                                                                                                                                                                                                                      | Results  |
|----|-----------------------------------------------------------------------------------------------------------------------------------------------------------------------------------------------------------------------------------------------------------------------------------------------------------------------------------------------------------------------------------------------------------------------------------------------------------------------------------------------------------------------------------------------------------------------------------------------------------------------------------------------------------------------------------------------------------------------------------------------------------------------------------------------|----------|
| #1 | ((((((((((((Human Papillomavirus Viruses[Mesh]) OR (Human Papillomavirus Viruses[Title/Abstract])) OR (Human Papillomavirus Virus[Title/Abstract])) OR (Papillomavirus Virus, Human[Title/Abstract])) OR (Virus, Human Papillomavirus[Title/Abstract])) OR (Human Papillomavirus[Title/Abstract])) OR (Human Papillomaviruses[Title/Abstract])) OR (HPV, Human Papillomavirus Viruses[Title/Abstract])) OR (Human Papilloma Virus[Title/Abstract])) OR (Human Papilloma Viruses[Title/Abstract])) OR (Papilloma Virus, Human[Title/Abstract])) OR (Virus, Human Papilloma[Title/Abstract])) OR (HPV Human Papillomavirus[Title/Abstract])) OR (HPV Human Papillomaviruses[Title/Abstract])) OR (Human Papillomavirus, HPV[Title/Abstract])) OR (Human Papillomaviruses, HPV[Title/Abstract])) | 51149    |
| #2 | ((Male [Mesh]) OR (Male [Title/Abstract])) OR (Males [Title/Abstract])                                                                                                                                                                                                                                                                                                                                                                                                                                                                                                                                                                                                                                                                                                                        | 7,620358 |
| #3 | (((((Vaccines [Mesh]) OR (Vaccines [Title/Abstract])) OR (Vaccine [Title/Abstract])) OR (immuni*[Title/Abstract])) OR (jab [Title/Abstract])) OR (inoculat*[Title/Abstract]))                                                                                                                                                                                                                                                                                                                                                                                                                                                                                                                                                                                                                 | 695156   |
| #4 | (((((hesitance*[Title/Abstract]) OR (willing*[Title/Abstract])) OR (accept*[Title/Abstract])) OR (perception [Title/Abstract])) OR (attitude [Title/Abstract])) OR (recognition[Title/Abstract]))                                                                                                                                                                                                                                                                                                                                                                                                                                                                                                                                                                                             | 1173256  |
| #5 | #1 and #2 and #3 and #4                                                                                                                                                                                                                                                                                                                                                                                                                                                                                                                                                                                                                                                                                                                                                                       | 651      |

### Web of Science

| #  | Searches                                                                                                                                                                                                                                                                                                                                                                                                                                                                            | Results |
|----|-------------------------------------------------------------------------------------------------------------------------------------------------------------------------------------------------------------------------------------------------------------------------------------------------------------------------------------------------------------------------------------------------------------------------------------------------------------------------------------|---------|
| #1 | TS= (Human Papillomavirus Viruses OR Human Papillomavirus Viruses OR Human Papillomavirus Virus OR Papillomavirus Virus, Human OR Virus, Human Papillomavirus OR Human Papillomavirus OR Human Papillomaviruses OR HPV, Human Papillomavirus Viruses OR Human Papilloma Virus OR Human Papilloma Viruses OR Papilloma Virus, Human OR Virus, Human Papilloma OR HPV Human Papillomavirus OR HPV Human Papillomaviruses OR Human Papillomavirus, HPV OR Human Papillomaviruses, HPV) | 65586   |
| #2 | TS= (Male OR Male OR Males)                                                                                                                                                                                                                                                                                                                                                                                                                                                         | 1402918 |
| #3 | TS= (Vaccines OR Vaccines OR Vaccine OR immuni* OR jab OR inoculat*)                                                                                                                                                                                                                                                                                                                                                                                                                | 846903  |
| #4 | TS= (hesitance* OR willing* OR accept* OR perception OR attitude OR recognition)                                                                                                                                                                                                                                                                                                                                                                                                    | 2992423 |
| #5 | #1 and #2 and #3 and #4                                                                                                                                                                                                                                                                                                                                                                                                                                                             | 475     |

## EMBASE

| #  | Searches                                                                                                                                                                                                                                                                                                                                                                                                                                                                                                                                                                                                                                  | Results |
|----|-------------------------------------------------------------------------------------------------------------------------------------------------------------------------------------------------------------------------------------------------------------------------------------------------------------------------------------------------------------------------------------------------------------------------------------------------------------------------------------------------------------------------------------------------------------------------------------------------------------------------------------------|---------|
| #1 | 'papillomavirus vaccines': ab, ti OR 'human papillomavirus vaccines': ab, ti OR 'human papillomavirus virus': ab, ti OR 'papillomavirus virus, human': ab, ti OR 'virus, human papillomavirus': ab, ti OR 'human papillomavirus': ab, ti OR 'human papillomaviruses': ab, ti OR 'hpv, human papillomavirus viruses': ab, ti OR 'human papilloma virus': ab, ti OR 'human papilloma viruses': ab, ti OR 'papilloma virus, human': ab, ti OR 'virus, human papilloma': ab, ti OR 'hpv human papillomavirus': ab, ti OR 'hpv human papillomaviruses': ab, ti OR 'human papillomavirus, hpv': ab, ti OR 'human papillomaviruses, hpv': ab, ti | 60352   |
| #2 | male: ab, ti OR males: ab, ti                                                                                                                                                                                                                                                                                                                                                                                                                                                                                                                                                                                                             | 2166904 |
| #3 | vaccines: ab, ti OR vaccine: ab, ti OR immuni*: ab, ti OR jab: ab ti OR inoculat*: ab, ti                                                                                                                                                                                                                                                                                                                                                                                                                                                                                                                                                 | 842051  |
| #4 | hesitance*: ab, ti OR willing*: ab, ti OR accept*: ab, ti OR perception: ab, ti OR attitude: ab, ti OR recognition: ab, ti                                                                                                                                                                                                                                                                                                                                                                                                                                                                                                                | 1552513 |
| #5 | #1 and #2 and #3 and #4                                                                                                                                                                                                                                                                                                                                                                                                                                                                                                                                                                                                                   | 305     |

## Ovid

| #  | Searches                                                                                                                                                                                                                                                                                                                                                                                                                                                                                                                      | Results |
|----|-------------------------------------------------------------------------------------------------------------------------------------------------------------------------------------------------------------------------------------------------------------------------------------------------------------------------------------------------------------------------------------------------------------------------------------------------------------------------------------------------------------------------------|---------|
| #1 | (Papillomavirus Vaccines or Human Papillomavirus Vaccines or Human Papillomavirus Virus or Papillomavirus Virus, Human or Virus, Human Papillomavirus or Human Papillomavirus or Human Papillomaviruses or HPV, Human Papillomavirus Viruses or Human Papilloma Virus or Human Papilloma Viruses or Papilloma Virus, Human or Virus, Human Papilloma or HPV Human Papillomavirus or HPV Human Papillomaviruses or Human Papillomavirus, HPV or Human Papillomaviruses, HPV).mp. [mp=title, abstract, full text, caption text] | 10265   |
| #2 | (Male or Males).mp. [mp=title, abstract, full text, caption text]                                                                                                                                                                                                                                                                                                                                                                                                                                                             | 385553  |
| #3 | (Vaccines or Vaccine or immuni* or jab or inoculat*).mp. [mp=title, abstract, full text, caption text]                                                                                                                                                                                                                                                                                                                                                                                                                        | 88303   |
| #4 | (hesitance* or willing* or accept* or perception or attitude or recognition).mp. [mp=title, abstract, full text, caption text]                                                                                                                                                                                                                                                                                                                                                                                                | 885986  |
| #5 | #1 and #2 and #3 and #4                                                                                                                                                                                                                                                                                                                                                                                                                                                                                                       | 914     |

## CNKI

| #  | Searches                                                                               | Results |
|----|----------------------------------------------------------------------------------------|---------|
| #1 | (主题: HPV (精确)) OR (主题: 人乳头状瘤病毒 (精确)) OR (主题: 人乳头状病毒 (精确)) OR (主题: 人乳头瘤病毒 (精确)) OR (主题: | 56      |

---

Human Papillomavirus(精确)AND ((主题: HPV 疫苗 (精确)) OR (主题: 疫苗 (精确) OR (主题: 宫颈癌疫苗 (精确)) OR (主题: 子宫颈癌疫苗 (精确)) OR (主题: 二价 (精确)) OR (主题: 四价 (精确)) OR (主题: 九价 (精确)) AND ((主题: 男性 (精确)) OR (主题: 男 (精确)) OR (主题: 男孩 (精确)) OR (主题: MSM (精确)) AND ((摘要: 犹豫 (精确)) OR (摘要: 知识 (精确)) OR (摘要: 安全性 (精确)) OR (摘要: 知晓 (精确)) OR (摘要: 意愿 (精确)) OR (摘要: 接受 (精确)) OR (摘要: 认知 (精确)) OR (摘要: 影响因素 (精确)) OR (摘要: 现状 (精确)) OR (摘要: 安全性 (精确))))

---

**CNKI (China National Knowledge Infrastructure) is a Chinese literature search database.**

**The English translation of the above table is as follows:**

**CNKI**

| #  | Searches                                                                                                                                                                                                                                                                                                                                                                                                                                                                                                                                                                                                                                                                                                                                                                                                                                                                                                                                                                                                                                                                           | Results |
|----|------------------------------------------------------------------------------------------------------------------------------------------------------------------------------------------------------------------------------------------------------------------------------------------------------------------------------------------------------------------------------------------------------------------------------------------------------------------------------------------------------------------------------------------------------------------------------------------------------------------------------------------------------------------------------------------------------------------------------------------------------------------------------------------------------------------------------------------------------------------------------------------------------------------------------------------------------------------------------------------------------------------------------------------------------------------------------------|---------|
| #1 | (MeSH Terms : HPV( precise)) OR (MeSH Terms: human papillomavirus ( precise)) OR ( MeSH Terms: human papillomavirus ( precise)) OR ( MeSH Terms: human papillomavirus ( precise)) OR ( MeSH Terms: Human Papillomavirus ( precise) AND (( MeSH Terms: HPV vaccine ( precise)) OR ( MeSH Terms: vaccine ( precise) OR ( MeSH Terms : cervical cancer vaccine ( precise)) OR ( MeSH Terms: cervical cancer vaccine ( precise)) OR ( MeSH Terms: bivalent ( precise)) OR ( MeSH Terms: quadrivalent ( precise)) OR ( MeSH Terms: 9-valent (precise)) AND (( MeSH Terms: male (precise)) OR ( MeSH Terms: men ( precise)) OR ( MeSH Terms: boy ( precise)) OR (MeSH Terms: MSM ( precise)) AND (( abstract: hesitancy ( precise)) OR ( abstract : knowledge ( precise)) OR ( abstract: safety ( precise)) OR ( abstract: awareness ( precise)) OR ( abstract: willingness ( precise)) OR ( abstract: acceptance ( precise)) OR ( abstract: cognitively ( precise)) OR( abstract: Influencing factors ( precise)) OR ( abstract: status ( precise)) OR ( abstract : safety ( precise))) | 56      |

**Wan Fang**

| #  | Searches                                                                                                                                                                                                                     | Results |
|----|------------------------------------------------------------------------------------------------------------------------------------------------------------------------------------------------------------------------------|---------|
| #1 | 主题: (HPV or 人乳头状瘤病毒 or 人乳头状病毒 or 人乳头瘤病毒 or Human Papillomavirus ) and 主题: (HPV 疫苗 or 疫苗 or 宫颈癌疫苗 or 子宫颈癌疫苗 or 二价 or 四价 or 九价) and 主题: (男性 or 男 or 男孩 or MSM) and 主题: (犹豫 or 知识 or 知晓 or 意愿 or 接受 or 认知 or 影响因素 or 现状 or 安全性) | 88      |

**Wan Fang (Wan Fang Data) is a Chinese literature search database. The English translation of the above table is as follows:**



| #  | Searches                                                                                                                                                                                                                                                                                                                                                                                                                                        | Results |
|----|-------------------------------------------------------------------------------------------------------------------------------------------------------------------------------------------------------------------------------------------------------------------------------------------------------------------------------------------------------------------------------------------------------------------------------------------------|---------|
| #1 | MeSH Terms:(HPV or Human papillomavirus or Human papillomavirus or Human papillomavirus or Human Papillomavirus) and MeSH Terms:(HPV vaccine or vaccine or cervical cancer vaccine or Cervical cancer vaccine or bivalent or quadrivalent or9-valent ) and MeSH Terms: (male or men or boy or MSM) and MeSH Terms: (hesitancy or knowledge or awareness or willingness or acceptance or cognitively or Influencing factors or status or safety) | 88      |

**Table S2.** Agency for Healthcare Research and Quality (AHRQ) Scale assessment items and scoring criteria

| Item                                                                                                                               | Yes | No | Unclear |
|------------------------------------------------------------------------------------------------------------------------------------|-----|----|---------|
| 1) Define the source of information (survey, record review)                                                                        |     |    |         |
| 2) List inclusion and exclusion criteria for exposed and unexposed subjects (cases and controls) or refer to previous publications |     |    |         |
| 3) Indicate time period used for identifying patients                                                                              |     |    |         |
| 4) Indicate whether or not subjects were consecutive if not population-based                                                       |     |    |         |
| 5) Indicate if evaluators of subjective components of study were masked to other aspects of the status of the participants         |     |    |         |
| 6) Describe any assessments undertaken for quality assurance purposes (e.g., test/retest of primary outcome measurements)          |     |    |         |
| 7) Explain any patient exclusions from analysis                                                                                    |     |    |         |
| Item                                                                                                                               | Yes | No | Unclear |
| 8) Describe how confounding was assessed and/or controlled.                                                                        |     |    |         |
| 9) If applicable, explain how missing data were handled in the analysis                                                            |     |    |         |
| 10) Summarize patient response rates and completeness of data collection                                                           |     |    |         |

|                                                                                                                                     |  |  |  |
|-------------------------------------------------------------------------------------------------------------------------------------|--|--|--|
| 11) Clarify what follow-up, if any, was expected and the percentage of patients for which incomplete data or follow-up was obtained |  |  |  |
|-------------------------------------------------------------------------------------------------------------------------------------|--|--|--|

Scoring criteria: each entry is evaluated using "yes," "no," and "unclear," with "yes" counting as 1 point and "no" or "unclear" counting as 0 points, and the scores of each entry are added up to the total score (0~11 points). A score of 0 to 3 was set as low quality, 4 to 7 as medium quality, and 8 to 11 as high quality.

**Table S3.** Literature quality assessment

| Studies                  | Item1 | Item2 | Item3 | Item4 | Item5   | Item6   | Item7 | Item8 | Item9 | Item10 | Item11  | quality assessment |
|--------------------------|-------|-------|-------|-------|---------|---------|-------|-------|-------|--------|---------|--------------------|
| Ferris, D., et al.       | yes   | yes   | yes   | yes   | yes     | yes     | yes   | yes   | no    | yes    | unclear | High               |
| Ferris, D., et al.       | yes   | yes   | yes   | yes   | yes     | yes     | yes   | yes   | no    | yes    | unclear | High               |
| Gottvall, M., et al.     | yes   | no    | yes   | yes   | no      | yes     | yes   | yes   | yes   | yes    | unclear | High               |
| Daley, E., et al.        | yes   | yes   | yes   | yes   | yes     | no      | yes   | yes   | no    | yes    | unclear | High               |
| Hernandez, B. Y., et al. | yes   | yes   | yes   | yes   | no      | no      | yes   | no    | no    | yes    | unclear | Moderate           |
| Reiter, P., et al.       | yes   | yes   | yes   | yes   | no      | yes     | yes   | yes   | no    | yes    | unclear | High               |
| Reiter, P. L., et al.    | yes   | no    | yes   | yes   | yes     | yes     | yes   | yes   | yes   | yes    | unclear | High               |
| Oh, J. K., et al.        | yes   | yes   | yes   | yes   | no      | no      | yes   | yes   | yes   | yes    | unclear | High               |
| Gilbert, P., et al.      | yes   | no    | yes   | yes   | yes     | no      | yes   | yes   | yes   | yes    | unclear | High               |
| Studies                  | Item1 | Item2 | Item3 | Item4 | Item5   | Item6   | Item7 | Item8 | Item9 | Item10 | Item11  | quality assessment |
| Gilbert, P., et al.      | yes   | no    | yes   | yes   | yes     | yes     | yes   | yes   | no    | yes    | unclear | High               |
| Katz, M. L., et al.      | yes   | no    | yes   | yes   | no      | unclear | no    | no    | no    | yes    | unclear | Moderate           |
| Wheldon, C. W., et al.   | yes   | yes   | yes   | yes   | no      | no      | yes   | yes   | yes   | yes    | unclear | High               |
| Thomas, Emily A., et al. | yes   | yes   | yes   | yes   | unclear | no      | no    | yes   | no    | yes    | unclear | Moderate           |

|                                      |     |     |     |     |         |         |         |     |     |         |         |          |
|--------------------------------------|-----|-----|-----|-----|---------|---------|---------|-----|-----|---------|---------|----------|
| Richard A., et al.                   | yes | yes | yes | yes | no      | no      | no      | yes | yes | yes     | unclear | Moderate |
| Colon-Lopez, V., et al.              | yes | yes | yes | yes | no      | no      | yes     | no  | yes | yes     | unclear | Moderate |
| Forster, A. S., et al.               | yes | yes | yes | yes | yes     | no      | yes     | yes | no  | yes     | unclear | High     |
| Rank, C., et al.                     | yes | yes | yes | yes | yes     | no      | yes     | yes | no  | yes     | unclear | High     |
| Al-Naggar RA.                        | yes | yes | yes | yes | unclear | no      | unclear | yes | no  | yes     | unclear | Moderate |
| Blodt, S., et al.                    | yes | yes | yes | yes | no      | no      | yes     | yes | no  | yes     | unclear | Moderate |
| Gutierrez Jr, B., et al.             | yes | yes | yes | yes | no      | yes     | no      | yes | no  | yes     | unclear | Moderate |
| Gray, Clive M., et al.               | yes | yes | yes | yes | unclear | no      | yes     | yes | yes | yes     | unclear | High     |
| Belani, H. K., et al.                | yes | yes | yes | yes | no      | unclear | yes     | no  | yes | yes     | unclear | Moderate |
| Gellenoncourt, A. and P. Di Patrizio | yes | yes | yes | yes | yes     | unclear | yes     | yes | yes | yes     | unclear | High     |
| Zou, H. C., et al.                   | yes | yes | yes | yes | no      | no      | unclear | yes | yes | yes     | unclear | Moderate |
| Khurana, S., et al.                  | yes | yes | yes | yes | unclear | no      | yes     | yes | yes | yes     | unclear | High     |
| Giuliani, M., et al.                 | yes | yes | yes | yes | yes     | no      | yes     | yes | no  | yes     | unclear | High     |
| Hunter, T. and M. Weinstein          | yes | yes | yes | yes | no      | no      | unclear | yes | yes | unclear | unclear | Moderate |
| Napolitano, F., et al.               | yes | yes | yes | yes | yes     | yes     | no      | yes | no  | yes     | unclear | High     |
| Zou, H. C., et al.                   | yes | yes | yes | yes | no      | no      | yes     | yes | no  | yes     | unclear | Moderate |

| Studies                     | Item1 | Item2 | Item3 | Item4 | Item5   | Item6 | Item7 | Item8 | Item9 | Item10 | Item11  | quality assessment |
|-----------------------------|-------|-------|-------|-------|---------|-------|-------|-------|-------|--------|---------|--------------------|
| Zhu,J.H., et al.            | yes   | no    | yes   | yes   | no      | no    | no    | yes   | yes   | yes    | unclear | Moderate           |
| C. Sadlier, et al.          | yes   | yes   | yes   | yes   | unclear | no    | no    | yes   | no    | yes    | unclear | Moderate           |
| Stephens, Dionne P., et al. | yes   | yes   | no    | yes   | unclear | no    | no    | yes   | yes   | yes    | unclear | Moderate           |
| Tian, T.                    | yes   | yes   | yes   | yes   | no      | no    | yes   | yes   | yes   | yes    | unclear | High               |

|                           |     |     |     |     |         |     |         |         |         |         |         |          |
|---------------------------|-----|-----|-----|-----|---------|-----|---------|---------|---------|---------|---------|----------|
| Hoefler, Lea, et al.      | yes | yes | yes | yes | no      | no  | yes     | yes     | no      | yes     | unclear | Moderate |
| Cheung, T., et al.        | yes | yes | yes | yes | yes     | no  | yes     | yes     | no      | yes     | unclear | High     |
| Stanley, C., et al.       | yes | yes | yes | yes | no      | yes | yes     | yes     | yes     | yes     | unclear | High     |
| Cooper, Dexter L., et al. | yes | no  | yes | yes | no      | no  | unclear | yes     | no      | yes     | unclear | Moderate |
| Nadarzynski, T., et al.   | yes | yes | yes | yes | unclear | no  | yes     | yes     | no      | yes     | unclear | Moderate |
| Tian, T., et al.          | yes | yes | yes | yes | no      | yes | no      | yes     | unclear | yes     | unclear | Moderate |
| Wong, L. P., et al.       | yes | yes | yes | yes | no      | yes | yes     | yes     | no      | yes     | unclear | High     |
| Kuang.J.Y., et al.        | no  | yes | yes | yes | no      | no  | no      | unclear | unclear | unclear | unclear | low      |
| li.Y.F., et al.           | yes | yes | yes | yes | yes     | yes | no      | yes     | yes     | yes     | unclear | High     |
| Wang, S., et al.          | yes | yes | yes | yes | yes     | yes | unclear | yes     | yes     | yes     | unclear | High     |
| Ren.W.J., et al.          | yes | yes | no  | yes | unclear | yes | no      | yes     | yes     | yes     | unclear | Moderate |
| Farsi, N. J., et al.      | yes | yes | yes | yes | yes     | no  | yes     | yes     | no      | yes     | unclear | High     |
| Bai.M.M.                  | yes | yes | yes | yes | unclear | yes | yes     | yes     | no      | yes     | unclear | High     |
| Wei He, et al.            | yes | yes | yes | yes | no      | no  | yes     | yes     | yes     | yes     | unclear | High     |
| Ye, Ze-Hao, et al.        | yes | yes | yes | yes | yes     | no  | no      | yes     | no      | yes     | unclear | Moderate |
| Chen, Q., et al.          | yes | no  | no  | yes | unclear | no  | yes     | yes     | yes     | yes     | unclear | Moderate |

| Studies          | Item1 | Item2 | Item3 | Item4 | Item5   | Item6 | Item7 | Item8 | Item9 | Item10 | Item11  | quality assessment |
|------------------|-------|-------|-------|-------|---------|-------|-------|-------|-------|--------|---------|--------------------|
| Pan, H., et al.  | yes   | yes   | yes   | yes   | unclear | no    | yes   | yes   | yes   | yes    | unclear | High               |
| Pham, D., et al. | yes   | yes   | yes   | yes   | unclear | no    | yes   | yes   | no    | yes    | unclear | Moderate           |
| Ran, H., et al.  | yes   | yes   | no    | yes   | yes     | yes   | yes   | yes   | no    | yes    | unclear | High               |
| Shi.J., et al.   | yes   | yes   | yes   | yes   | unclear | no    | no    | yes   | yes   | yes    | unclear | Moderate           |
| Zhang.H., et al. | yes   | yes   | yes   | yes   | no      | yes   | no    | yes   | yes   | yes    | unclear | High               |

|                                |     |     |     |     |         |     |         |     |         |     |         |          |
|--------------------------------|-----|-----|-----|-----|---------|-----|---------|-----|---------|-----|---------|----------|
| Zhang.J., et al.               | yes | yes | yes | yes | no      | no  | yes     | no  | no      | yes | unclear | Moderate |
| Gursoy, M. Y.<br>and F. Sagtas | yes | yes | yes | yes | unclear | no  | unclear | yes | unclear | yes | unclear | Moderate |
| Lv.H.W, et al.                 | yes | yes | yes | yes | no      | yes | yes     | no  | unclear | yes | unclear | Moderate |

**Table S4.** HPV vaccine acceptance in different WHO areas and countries

| Countries and regions                      | no. of studies | sample size | acceptance rate (%) | 95%-CI           |
|--------------------------------------------|----------------|-------------|---------------------|------------------|
| <b>Americas region of WHO</b>              | 19             | 8555        | 57.12               | [0.4592; 0.6798] |
| United States                              | 17             | 7472        | 55.12               | [0.4300; 0.6694] |
| Canada                                     | 2              | 1083        | 72.43               | [0.5890; 0.8417] |
| <b>Eastern Mediterranean Region of WHO</b> | 2              | 873         | 47.54               | [0.4423; 0.5086] |
| U.A.E                                      | 1              | 356         | 46.07               | [0.4091; 0.5127] |
| Saudi Arabia                               | 1              | 517         | 48.55               | [0.4425; 0.5286] |
| <b>European Region of WHO</b>              | 10             | 6028        | 48.09               | [0.2963; 0.6682] |
| UK                                         | 2              | 1823        | 63.48               | [0.2130; 0.9581] |
| Italy                                      | 2              | 1159        | 64.59               | [0.5121; 0.7690] |
| France                                     | 1              | 328         | 34.45               | [0.2940; 0.3969] |
| Turkey                                     | 1              | 1646        | 10.45               | [0.0902; 0.1198] |
| Ireland                                    | 1              | 281         | 30.96               | [0.2568; 0.3650] |
| Greece                                     | 1              | 298         | 76.85               | [0.7188; 0.8147] |
| Sweden                                     | 1              | 261         | 74.33               | [0.6884; 0.7946] |
| Germany                                    | 1              | 232         | 8.19                | [0.0497; 0.1210] |
| <b>South-East Asia Region of WHO</b>       | 1              | 178         | 89.89               | [0.8499; 0.9393] |
| India                                      | 1              | 178         | 89.89               | [0.8499; 0.9393] |
| <b>Western Pacific Region of WHO</b>       | 24             | 17328       | 50.81               | [0.4073; 0.6087] |
| China                                      | 20             | 13459       | 51.52               | [0.3959; 0.6337] |
| Malaysia                                   | 2              | 3173        | 51.46               | [0.4462; 0.5828] |
| Australia                                  | 1              | 200         | 30.00               | [0.2383; 0.3655] |
| Korea                                      | 1              | 496         | 55.44               | [0.5105; 0.5980] |

WHO, World Health Organization
